# Supplementary material
Source: PubMed Central journal article supplement (PMC5597046)

## Supporting Information

### for Highly efficient chemoenzymatic synthesis and facile purification of $\alpha$ -Gal pentasaccharyl ceramide Gal $\alpha$ 3nLc $_4$ $\beta$ Cer

Abhishek Santra,<sup>a</sup> Yanhong Li,<sup>a</sup> Hai Yu,<sup>a</sup> Teri J. Slack,<sup>a</sup> Peng George Wang,<sup>b</sup> Xi Chen<sup>a,\*</sup>

<sup>a</sup>Department of Chemistry, University of California, One Shields Avenue, Davis, CA 95616, USA

<sup>b</sup>Department of Chemistry and Center of Diagnostics & Therapeutics, Georgia State University, Atlanta, GA 30303, USA

|                                                                                                                                                                                                                                                                                                             |       |
|-------------------------------------------------------------------------------------------------------------------------------------------------------------------------------------------------------------------------------------------------------------------------------------------------------------|-------|
| Table of Contents.....                                                                                                                                                                                                                                                                                      | S1    |
| General methods for compound purification and characterization .....                                                                                                                                                                                                                                        | S2    |
| Synthesis of (2R,3R,4E)-2-azido-3- <i>O</i> -benzoyloxy-1- <i>O</i> -tertbutyldiphenylsilyloxy-octadec-4-ene ( <b>11</b> ).....                                                                                                                                                                             | S2    |
| Synthesis of (2S,3R,4E)-2-azido-3- <i>O</i> -benzoyloxy-octadec-4-ene-1-ol ( <b>12</b> ).....                                                                                                                                                                                                               | S3    |
| Synthesis of <i>O</i> -(2,3,4,6-tetra- <i>O</i> -benzoyl- $\beta$ -D-galactopyranosyl)-(1 $\rightarrow$ 4)-(2,3,6-tri- <i>O</i> -benzoyl- $\beta$ -D-glucopyranosyl)-(1 $\rightarrow$ 1)-(2S, 3R, 4E)-2-azido-3- <i>O</i> -benzoyloxy-octadec-4-ene ( <b>14</b> ).....                                      | S3    |
| Synthesis of Lac $\beta$ Sph ( <b>5</b> ).....                                                                                                                                                                                                                                                              | S3–S4 |
| One-pot four-enzyme preparative-scale synthesis of Lc $_3$ $\beta$ Sph ( <b>4</b> ).....                                                                                                                                                                                                                    | S4    |
| One-pot four-enzyme preparative-scale synthesis of nLc $_4$ $\beta$ Sph ( <b>3</b> ).....                                                                                                                                                                                                                   | S5    |
| One-pot four-enzyme preparative-scale synthesis of Gal $\alpha$ 3nLc $_4$ $\beta$ Sph ( <b>2</b> ).....                                                                                                                                                                                                     | S5–S6 |
| Synthesis of Gal $\alpha$ 3nLc $_4$ $\beta$ Cer ( <b>1</b> ).....                                                                                                                                                                                                                                           | S6    |
| References.....                                                                                                                                                                                                                                                                                             | S7    |
| <sup>1</sup> H and <sup>13</sup> C NMR spectra of (2R,3R,4E)-2-azido-3- <i>O</i> -benzoyloxy-1- <i>O</i> -tertbutyldiphenylsilyloxy-octadec-4-ene ( <b>11</b> ).....                                                                                                                                        | S8    |
| <sup>1</sup> H and <sup>13</sup> C NMR spectra of (2S,3R,4E)-2-azido-3- <i>O</i> -benzoyloxy-octadec-4-ene-1-ol ( <b>12</b> ).....                                                                                                                                                                          | S9    |
| <sup>1</sup> H and <sup>13</sup> C NMR spectra of <i>O</i> -(2,3,4,6-tetra- <i>O</i> -benzoyl- $\beta$ -D-galactopyranosyl)-(1 $\rightarrow$ 4)-(2,3,6-tri- <i>O</i> -benzoyl- $\beta$ -D-glucopyranosyl)-(1 $\rightarrow$ 1)-(2S, 3R, 4E)-2-azido-3- <i>O</i> -benzoyloxy-octadec-4-ene ( <b>14</b> )..... | S10   |
| <sup>1</sup> H and <sup>13</sup> C NMR spectra of Lac $\beta$ Sph ( <b>5</b> ).....                                                                                                                                                                                                                         | S11   |
| <sup>1</sup> H and <sup>13</sup> C NMR spectra of Lc $_3$ $\beta$ Sph ( <b>4</b> ).....                                                                                                                                                                                                                     | S12   |
| <sup>1</sup> H and <sup>13</sup> C NMR spectra of nLc $_4$ $\beta$ Sph ( <b>3</b> ).....                                                                                                                                                                                                                    | S13   |
| <sup>1</sup> H and <sup>13</sup> C NMR spectra of Gal $\alpha$ 3nLc $_4$ $\beta$ Sph ( <b>2</b> ).....                                                                                                                                                                                                      | S14   |
| <sup>1</sup> H and <sup>13</sup> C NMR spectra of Gal $\alpha$ 3nLc $_4$ $\beta$ Cer ( <b>1</b> ).....                                                                                                                                                                                                      | S15   |

## General methods for compound purification and characterization

Chemicals were purchased and used without further purification. <sup>1</sup>H NMR and <sup>13</sup>C NMR spectra were recorded on 800 MHz Bruker Avance III spectrometers. High resolution electrospray ionization (ESI) mass spectra were obtained using Thermo Electron LTQ-Orbitrap Hybrid MS at the Mass Spectrometry Facility in the University of California, Davis. Silica gel 60 Å (230–400 mesh, Sorbent Technologies) was used for flash column chromatography. RediSep<sup>®</sup> R<sub>f</sub> C18 Aq Gold cartridges were bought from Teledyne Isco Inc. Thin-layer chromatography (TLC, Sorbent Technologies) was performed on silica gel plates using anisaldehyde sugar staining or 5% sulfuric acid in ethanol staining for detection. Phytoshingosine was purchased from TCI America. D-Galactose (Gal) and *N*-acetyl-D-glucosamine (GlcNAc) were purchased from Fisher Scientific (Pittsburgh, Pennsylvania, USA). Guanidine 5'-triphosphate (GTP) was bought from Hangzhou Meiya Pharmacy (Hangzhou, China). Adenosine 5'-triphosphate (ATP) was bought from Beta Pharma Scientific, Inc (Branford, CT). Uridine-5'-triphosphate (UTP) was bought from Chemfun Medical Technology Co. Recombinant enzymes *Streptococcus pneumoniae* TIGR4 galactokinase (SpGalK),<sup>1</sup> *Pasteurella multocida* *N*-acetylglucosamine uridyltransferase (PmGlmU),<sup>2</sup> *Bifidobacterium longum* strain ATCC55813 *N*-acetylhexosamine-1-kinase (BiNahK),<sup>3</sup> *Pasteurella multocida* inorganic pyrophosphatase (PmPpA),<sup>4</sup> *Neisseria meningitidis* β1–3-*N*-acetylglucosaminyltransferase (NmLgtA),<sup>5</sup> *Bifidobacterium longum* UDP-sugar pyrophosphorylase (BLUSP),<sup>6</sup> bovine α1–3-galactosyltransferase (Bα1–3GalT),<sup>7</sup> *Neisseria meningitidis* β1–4-galactosyltransferase (NmLgtB)<sup>4</sup> were expressed and purified as described previously. One unit (U) is defined as the amount of the enzyme that catalyzes the conversion of 1 μmol of substrate per minute at 30 °C for NmLgtA or 37 °C for all other enzymes.

### (2*R*,3*R*,4*E*)-2-Azido-3-*O*-benzoyloxy-1-*O*-tertbutyldiphenylsilyloxy-octadec-4-ene (**11**)<sup>8</sup>

Compound **10** was synthesized from commercially available phytosphingosine (**6**) as reported previously.<sup>9</sup> For the synthesis of compound **11**, to a solution of compound **10** (3.9 g, 6.9 mmol) in dry CH<sub>2</sub>Cl<sub>2</sub> (25 mL), Et<sub>3</sub>N (5.8 mL, 41.4 mmol) and 4-dimethyl amino pyridine (DMAP) (0.84 mg, 0.69 mmol) were added and the mixture was stirring at 0 °C. Benzoyl chloride (1.6 mL, 13.8 mmol) was then added to the stirring reaction mixture drop-wisely. The reaction was allowed to warm up to r.t. and stirred for overnight, until TLC analysis (hexane:ethyl acetate = 9:1 by volume and detected with *p*-anisaldehyde sugar stain) showed total consumption of the starting material. The reaction was then diluted with CH<sub>2</sub>Cl<sub>2</sub>, washed with HCl (1 N), saturated NaHCO<sub>3</sub> solution, and brine (10% NaCl solution), and was dried with Na<sub>2</sub>SO<sub>4</sub>. After filtration, the solvent was removed under reduced pressure and the product was purified by silica gel chromatography using hexane:EtOAc = 20:1 (by volume) as an eluent to produce compound **11** (4.3 g, 95%) as a colorless oil. <sup>1</sup>H NMR (800 MHz, CDCl<sub>3</sub>) δ 8.02–8.01 (m, 2H), 7.69–7.65 (m, 4H), 7.59–7.56 (m, 1H), 7.45–7.39 (m, 6H), 7.3 (t, *J* = 7.5 Hz, 2H), 5.90 (dt, *J* = 15.2, 6.4 Hz, 1H), 5.69–5.67 (m, 1H), 5.53–5.49 (m, 1H), 3.85–3.82 (m, 1H), 3.76–3.74 (m, 2H), 2.05–2.00 (m, 2H), 1.35–1.24 (m, 22H), 1.08 (br s, 9H), 0.89 (t, *J* = 7.2 Hz, 3H). <sup>13</sup>C NMR (200 MHz, CDCl<sub>3</sub>) δ 165.35, 138.68, 135.74, 135.73, 133.26, 133.00, 132.87, 130.24, 130.04, 130.00, 129.91, 129.85, 128.58, 127.99, 127.98, 127.94, 123.38, 77.36, 77.20, 77.04, 74.49, 65.94, 63.53, 32.53, 32.12, 29.88, 29.86, 29.85, 29.76, 29.61, 29.55, 29.31, 28.89, 26.87, 22.89, 19.30, 14.32. ESI HRMS (*m/z*) calculated for C<sub>41</sub>H<sub>57</sub>N<sub>3</sub>O<sub>3</sub>Si (M + H) 668.4241, found 668.4278.

*(2S,3R,4E)-2-Azido-3-O-benzoyloxy-octadec-4-ene-1-ol (12)*<sup>8</sup>

To a solution of compound **11** (3.75 g, 5.61 mmol) in dry THF (40 mL) in a plastic flask, 65–70% HF-pyridine solution (1.8 mL) was added drop-wisely to the stirred mixture at 0 °C. The reaction mixture was stirred at r.t. for about 4 h until complete consumption of compound **11** as judged by TLC analysis (hexane:ethyl acetate = 8:1 by volume and detected with *p*-anisaldehyde sugar stain). The reaction mixture was then quenched using solid NaHCO<sub>3</sub>. EtOAc (50 mL) and H<sub>2</sub>O (50 mL) were then added. The aqueous phase was extracted twice with EtOAc. The combined organic phase was washed with a saturated aqueous solution of NaHCO<sub>3</sub> and dried over Na<sub>2</sub>SO<sub>4</sub>. After filtration, the solvent was removed under reduced pressure and the product was purified by silica gel chromatography using hexane:EtOAc = 6:1 (by volume) as an eluent to produce compound **12** (2.3g, 97%) as a off-white residue. <sup>1</sup>H NMR (800 MHz, CDCl<sub>3</sub>) δ 8.07–8.02 (m, 2H), 7.60–7.56 (m, 1H), 7.45 (t, *J* = 7.2 Hz, 2H), 5.96 (dt, *J* = 15.2, 6.4 Hz, 1H), 5.65–5.58 (m, 2H), 3.83–3.79 (m, 1H), 3.77–3.73 (m, 1H), 3.65–3.61 (m, 1H), 2.18–2.16 (m, 1H), 2.11–2.03 (m, 2H), 1.43–1.34 (m, 2H), 1.31–1.20 (m, 22H), 0.88 (t, *J* = 7.2 Hz, 3H). <sup>13</sup>C NMR (200 MHz, CDCl<sub>3</sub>) δ 165.68, 138.99, 133.50, 129.96, 129.89, 128.65, 123.40, 74.81, 66.37, 62.14, 32.54, 32.09, 29.85, 29.84, 29.82, 29.81, 29.74, 29.58, 29.53, 29.30, 28.85, 22.86, 14.30. ESI HRMS (*m/z*) calculated for C<sub>25</sub>H<sub>39</sub>N<sub>3</sub>O<sub>3</sub> (M + Na) 452.2883, found 452.2835.

*O-(2,3,4,6-Tetra-O-benzoyl-β-D-galactopyranosyl)-(1→4)-(2,3,6-tri-O-benzoyl-β-D-glucopyranosyl)-(1→1)-(2S, 3R, 4E)-2-azido-3-O-benzoyloxy-octadec-4-ene (14)*<sup>10</sup>

To a solution of perbenzoylated lactosyl trichloroacetimidate **13** (1.1 g, 0.90 mmol)<sup>10</sup> and acceptor **12** (300 mg, 0.69 mmol) in 25 mL of dry CH<sub>2</sub>Cl<sub>2</sub>, powdered molecular sieves (4Å, 1.0 g) were added. The mixture was stirred under argon at r.t. for 30 min. The reaction mixture was cooled down to -18 °C and BF<sub>3</sub>·OEt<sub>2</sub> (377 μL, 1.0 mmol) was added. The reaction mixture was then stirred at -20 °C until TLC analysis (hexane:ethyl acetate = 3:1 by volume and detected with *p*-anisaldehyde sugar stain) showed fully conversion of the acceptor (30–45 min). The reaction was quenched with Et<sub>3</sub>N, and the solid was filtered off. The filtrate was concentrated under vacuum, and the residue was purified by silica gel chromatography using hexane:EtOAc = 3:1 (by volume) as an eluent to produce compound **14** (930 mg, 90%) as a colorless oil. <sup>1</sup>H NMR (800 MHz, CHCl<sub>3</sub>): δ 8.01–7.15 (40 H, Ar-H), 5.82 (t, *J* = 9.6 Hz, 1H), 5.73–5.70 (m, 2H), 5.67 (dt, *J* = 16.0, 6.4 Hz, 1H), 5.51–5.48 (m, 2H), 5.43–5.37 (m, 2H), 4.87 (d, *J* = 8.0 Hz, 1H), 4.73 (d, *J* = 8.0 Hz, 1H), 4.57 (dd, *J* = 12.0, 1.6 Hz, 1H), 4.48 (dd, *J* = 12.0, 4.8 Hz, 1H), 4.28 (t, *J* = 9.6 Hz, 1H), 3.91–3.88 (m, 2H), 3.86–3.84 (m, 2H), 3.74–3.69 (m, 2H), 3.55–3.53 (m, 1H), 1.88 (q, *J* = 7.4 Hz, 2H), 1.30–1.2 (m, 2H), 1.25–1.20 (m, 20H), 0.88 (t, *J* = 7.2 Hz, 3H). <sup>13</sup>C NMR (800 MHz, CHCl<sub>3</sub>): δ 165.82, 165.57, 165.42, 165.24, 165.03, 164.94, 164.83, 138.98, 133.56, 133.44 (2C), 133.40, 133.36, 133.28, 133.25, 133.22, 133.07, 130.01, 129.92–122.39 (Ar-C), 101.03, 100.83, 75.87, 74.79, 73.11, 72.86, 71.77, 71.62, 71.41, 69.88, 68.29, 67.52, 63.41, 62.26, 61.06, 32.28, 31.95, 29.72, 29.69, 29.67, 29.60, 29.39, 29.38, 29.15, 28.60, 22.72, 14.16. ESI HRMS (*m/z*) calculated for C<sub>86</sub>H<sub>87</sub>N<sub>3</sub>O<sub>20</sub> (M + H) 1482.5955, found 1482.5921.

*Gram-scale synthesis of LacβSph (5): O-(β-D-galactopyranosyl)-(1→4)-(β-D-glucopyranosyl)-(1→1)-(2S, 3R, 4E)-2-amino-octadec-4-ene-1,3-diol (5)*<sup>11</sup>

To a solution of **14** (2.9 g, 1.95 mmol) in dry MeOH (50 mL), NaOMe (250 mg) was added. After being stirred at r.t. for 6 h, the reaction mixture was neutralized with Dowex 50W (H<sup>+</sup>), filtered and concentrated under reduced pressure. This intermediate was used in the next step without further purification. To the dry intermediate (1.25 g, 1.92 mmol) in pyridine-water (1:1 v/v, 30 mL), 1,3-propanedithiol<sup>12</sup> (1.9 mL, 19 mmol) and Et<sub>3</sub>N (2 mL) were added and the mixture was stirred at 50 °C for 48 h. The reaction mixture was concentrated and purified by silica gel chromatography using chloroform:methanol:water (5:4:1 v/v/v) as an eluent to produce compound **5** (1.10 g, 94%) as a white amorphous powder. <sup>1</sup>H NMR (800 MHz, MeOD) δ 5.81–5.74 (m, 1H), 5.49 (dd, *J* = 12.4, 7.2 Hz, 1H), 4.36 (d, *J* = 8.0 Hz, 1H), 4.31 (d, *J* = 8.0 Hz, 1H), 4.06 (t, *J* = 6.4 Hz, 1H), 3.91 (dd, *J* = 12.0, 2.4 Hz, 1H), 3.89–3.82 (m, 2H), 3.82 (dd, *J* = 3.2, .8 Hz, 1H), 3.80–3.76 (m, 2H), 3.70 (dd, *J* = 12.0, 4.8 Hz, 1H), 3.61–3.51 (m, 4H), 3.48 (dd, *J* = 9.6, 3.2 Hz, 1H), 3.44–3.40 (m, 1H), 3.28 (dd, *J* = 8.8, 7.2 Hz, 1H), 3.02 – 2.97 (m, 1H), 2.11–2.07 (m, 2H), 1.45–1.39 (m, 2H), 1.36–1.25 (m, 20H), 0.90 (t, *J* = 7.2 Hz, 3H). <sup>13</sup>C NMR (200 MHz, MeOD) δ 136.02, 130.54, 105.31, 104.37, 80.70, 77.30, 76.73, 76.47, 75.02, 74.88, 74.04, 72.74, 70.92, 70.50, 62.70, 61.99, 56.50, 33.63, 33.28, 31.00, 30.96, 30.84, 30.68, 30.58, 30.54, 23.94, 14.64. ESI HRMS (*m/z*) calculated for C<sub>30</sub>H<sub>57</sub>NO<sub>12</sub> (M + H) 624.3954, found: 624.3945.

*One-pot four-enzyme synthesis of Lc<sub>3</sub>βSph (4): O-(2-acetamido-2-deoxy-β-D-glucopyranosyl)-(1→3)-(β-D-galactopyranosyl)-(1→4)-(β-D-glucopyranosyl)-(1→1)-(2S, 3R, 4E)-2-aminooctadec-4-ene-1,3-diol (4)*

To prepare the trisaccharide **4**, NmLgtA (0.5 mg, 0.29 U/mg when LacβMU was used as the acceptor substrate)<sup>5</sup> was added to a centrifuge tube (10 mL) containing 25 mg of LacβSph (**5**), GlcNAc (1.2 eq., 10 mg), ATP (1.5 eq., 33 mg), UTP (1.5 eq, 30 mg.), MgCl<sub>2</sub> (20 mM), Tris-HCl buffer (100 mM, pH = 8.0), BiNahK (0.7 mg, 1.4 U/mg when GlcNAc was used as the substrate),<sup>3</sup> PmGlmU (1.25 mg), PmPpA (1 mg), and water. The total volume was brought up to 9.5 mL. The reaction mixture was incubated at 37 °C for 52 h. The reaction progress was monitored using mass spectrometry and TLC (CHCl<sub>3</sub>:MeOH:H<sub>2</sub>O = 5:4:1, by volume). After the reaction reached to an optimum yield, reaction mixture was diluted with the same volume of ethanol and the solution was incubated at 4 °C for 30 min. The precipitates were removed by centrifugation and the supernatant was concentrated. The residue was dissolved in 2–3 mL of water at 40–45 °C and the solution was directly loaded to a preconditioned RediSep<sup>®</sup>R<sub>f</sub> C18 cartridge (5.5 g media) through a 10 mL plastic syringe. After loading, the cartridge was washed with acidic deionized water (10 mL with 0.01% TFA v/v) to wash out non-lipid components. The product was eluted from the C18 cartridge with 37% acetonitrile and 0.01% TFA in water (v/v). The elute solvent was collected in 1–1.5 mL fractions. Unreacted LacβSph was eluted with 50% acetonitrile in 0.01% TFA/H<sub>2</sub>O. The whole process took 20–30 minutes. The target glycolipid **4** (27 mg, 83%) was isolated after lyophilization. <sup>1</sup>H NMR (800 MHz, MeOD) δ 6.03–5.75 (m, 1H), 5.48 (dd, *J* = 15.2, 7.2 Hz, 1H), 4.64 (d, *J* = 8.8 Hz, 1H), 4.36 (d, *J* = 8.8 Hz, 1H), 4.35 (d, *J* = 8.8 Hz, 1H), 4.31 (t, *J* = 5.6 Hz, 1H), 4.05 (d, *J* = 3.2 Hz, 1H), 3.98 (dd, *J* = 12.0, 8.8 Hz, 1H), 3.95–3.89 (m, 2H), 3.88–3.82 (m, 2H), 3.78 (dd, *J* = 12.0, 7.2 Hz, 1H), 3.72–3.66 (m, 3H), 3.64–3.52 (m, 6H), 3.48–3.43 (m, 2H), 3.38 (m, 1H), 3.33 (t, *J* = 9.6 Hz, 1H), 3.29–3.26 (m, 1H), 2.16–2.10 (m, 2H), 2.00 (s, 3H), 1.45–1.41 (m, 2H), 1.35–1.23 (m, 20H), 0.90 (t, *J* = 7.2 Hz, 3H). <sup>13</sup>C NMR (200 MHz, MeOD) δ 174.77, 137.02, 128.48, 105.16, 104.42, 103.93, 83.57, 80.32, 78.15, 76.92, 76.84, 76.51, 75.98, 74.71, 72.06, 71.78, 71.07, 70.14, 67.27, 62.71, 61.85, 57.85, 56.86, 33.57, 33.27, 30.99, 30.96, 30.95,

30.84, 30.68, 30.60, 30.37, 23.94, 23.27, 14.64. ESI HRMS (m/z) calculated for C<sub>38</sub>H<sub>70</sub>N<sub>2</sub>O<sub>17</sub> (M + H) 827.4747, found 827.4798.

*One-pot four-enzyme synthesis of nLc<sub>4</sub>βSph (3): O-(β-D-galactopyranosyl)-(1→4)-(2-acetamido-2-deoxy-β-D-glucopyranosyl)-(1→3)-(β-D-galactopyranosyl)-(1→4)-(β-D-glucopyranosyl)-(1→1)-(2S, 3R, 4E)-2-aminooctadec-4-ene-1, 3-diol (3)*<sup>13</sup>

To prepare the tetrasaccharide **3**, NmLgtB (0.3 mg, 0.07 U/mg when GlcNAcβMU was used as the acceptor substrate)<sup>4</sup> was added to a centrifuge tube (10 mL) containing 20 mg of the trisaccharide acceptor **4**, Gal (1.2 eq., 5 mg), ATP (1.5 eq., 20 mg), UTP (1.5 eq., 18 mg), MgCl<sub>2</sub> (20 mM), Tris-HCl buffer (100 mM, pH = 8.0), SpGalK (0.40 mg), BLUSP (0.5 mg, 56 U/mg when glucose-1-phosphate was used as the substrate),<sup>1</sup> PmPpA (0.8 mg) and water. The total volume was brought up to 6 mL. The reaction mixture was incubated at 37 °C for 30 h. The reaction progress was monitored using mass spectrometry and TLC (CHCl<sub>3</sub>:MeOH:H<sub>2</sub>O = 5:4.5:1.5). After the reaction was reached to an optimum yield, reaction mixture was diluted with the same volume of ethanol and incubated at 4 °C for 30 min. The precipitates were removed by centrifugation and the supernatant was concentrated. The residue was dissolved in 2–3 mL of water at 40–45 °C. Then the solution was directly loaded to a preconditioned RediSep<sup>®</sup> R<sub>f</sub> C18 cartridge (5.5 g media) through a 10 mL plastic syringe and washed with acidic deionized water (10 mL with 0.01% TFA v/v) to wash out non-lipid components. The elute solvent was collected in 1–1.5 mL fractions. The product was eluted from the C18 cartridge with 35% acetonitrile and 0.01% TFA in water (v/v). The whole process takes about 20–30 minutes. The target glycolipid **3** (22 mg, 92%) was obtained as white powder after lyophilization. <sup>1</sup>H NMR (800 MHz, MeOD) δ 5.86–5.82 (m, 1H), 5.48 (dd, *J* = 15.2, 7.2 Hz, 1H), 4.66 (d, *J* = 8.8 Hz, 1H), 4.36 (d, *J* = 8.8 Hz, 1H), 4.35 (d, *J* = 4.8 Hz, 1H), 4.34 (d, *J* = 4.8 Hz, 1H), 4.24 (t, *J* = 5.6 Hz, 1H), 4.04 (d, *J* = 3.2 Hz, 1H), 3.96–3.90 (m, 3H), 3.90–3.85 (m, 3H), 3.83 (dd, *J* = 11.9, 4.8 Hz, 1H), 3.81 (d, *J* = 3.2 Hz, 1H), 3.79–3.74 (m, 3H), 3.72–3.67 (m, 2H), 3.66–3.60 (m, 3H), 3.60–3.51 (m, 6H), 3.48 (dd, *J* = 9.6, 3.2 Hz, 1H), 3.46–3.43 (m, 1H), 3.42–3.40 (m, 1H), 3.28 (m, 1H), 2.14–2.07 (m, 2H), 1.99 (s, 3H), 1.45–1.39 (m, 2H), 1.36–1.24 (m, 20H), 0.90 (t, *J* = 7.2 Hz, 3H). <sup>13</sup>C NMR (200 MHz, MeOD) δ 174.56, 136.81, 128.94, 105.26, 105.17, 104.42, 104.02, 83.64, 80.71, 80.34, 77.38, 76.89, 76.83, 76.72, 76.51, 75.04, 74.74, 74.10, 72.80, 71.76, 70.53, 70.11, 62.76, 62.67, 61.91, 61.87, 57.12, 56.78, 33.59, 33.28, 31.00, 30.97, 30.96, 30.84, 30.68, 30.60, 30.42, 23.94, 23.24, 14.64. ESI HRMS (m/z) calculated for C<sub>44</sub>H<sub>80</sub>N<sub>2</sub>O<sub>22</sub> (M + H) 989.5275, found: 989.5287.

*One-pot four-enzyme synthesis of Galα3nLc<sub>4</sub>βSph (2): O-(α-D-galactopyranosyl)-(1→3)-(β-D-galactopyranosyl)-(1→4)-(2-acetamido-2-deoxy-β-D-glucopyranosyl)-(1→3)-(β-D-galactopyranosyl)-(1→4)-(β-D-glucopyranosyl)-(1→1)-(2S, 3R, 4E)-2-aminooctadec-4-ene-1,3-diol (2)*<sup>14</sup>

To prepare the pentasaccharide **2**, Bα1–3GalT (0.3 mg, 10.6 U/mg when lactose was used as the acceptor substrate)<sup>7</sup> was added to a centrifuge tube (10 mL) containing 12 mg of the tetrasaccharide acceptor **3**, Gal (1.2 eq., 3 mg), ATP (2 eq., 14 mg), UTP (2 eq., 12 mg), MgCl<sub>2</sub> (20 mM), MnCl<sub>2</sub> (20 mM), Tris-HCl buffer (100 mM, pH = 7.5), SpGalK (0.6 mg), BLUSP (0.9 mg, 56 U/mg when glucose-1-phosphate was used as the substrate),<sup>1</sup> PmPpA (0.5 mg) and water. The total volume

was bought up to 3 mL). The reaction mixture was incubated at 37 °C for 48 h. The reaction progress was monitored using mass spectrometry and TLC (CHCl<sub>3</sub>:MeOH:H<sub>2</sub>O = 5:4.5:1.5, by volume). After the reaction was reached to an optimum yield, reaction mixture was diluted with the same volume of ethanol and incubated at 4 °C for 30 min. The precipitates were removed by centrifugation and the supernatant was concentrated. The residue was dissolved in 2–3 mL of water at 40–45 °C. Then the solution was directly loaded to a preconditioned RediSep<sup>®</sup> R<sub>f</sub> C18 cartridge (5.5 g media) through a 10 mL plastic syringe and washed with acidic deionized water (10 mL with 0.1% TFA v/v) to wash out non-lipid components. The elute solvent was collected in 1–1.5 mL fractions. The product was eluted from the C18 cartridge with 32% acetonitrile in 0.1% TFA/water (v/v) and the unreacted acceptor was eluted using 35% or a higher concentration (50%) of acetonitrile in 0.1% TFA/H<sub>2</sub>O. The whole process took about 20–30 minutes. The target glycolipid **2** (12.8 mg, 88%) was obtained after lyophilization. <sup>1</sup>H NMR (800 MHz, MeOD) δ 5.89–5.81 (m, 1H), 5.48 (dd, *J* = 15.2, 7.2 Hz, 1H), 5.03 (d, *J* = 2.4 Hz, 1H), 4.66 (d, *J* = 8.0 Hz, 1H), 4.43 (d, *J* = 8.0 Hz, 1H), 4.36 (t, *J* = 8.8 Hz, 2H), 4.31 (t, *J* = 5.6 Hz, 1H), 4.22 (t, *J* = 5.6 Hz, 1H), 4.04 (dd, *J* = 7.2, 3.2 Hz, 2H), 3.99–3.96 (m, 1H), 3.95–3.89 (m, 4H), 3.87 (dd, *J* = 12.0, 4.0 Hz, 1H), 3.85–3.82 (m, 3H), 3.80–3.74 (m, 3H), 3.73–3.68 (m, 4.5 H), 3.67 (d, *J* = 3.2 Hz, .5H), 3.66–3.60 (m, 4H), 3.60–3.52 (m, 5H), 3.47–3.43 (m, 1H), 3.42–3.38 (m, 2H), 3.29 (m, 1H), 2.13–2.09 (m, 2H), 1.99 (s, 3H), 1.44–1.41 (m, 2H), 1.36–1.25 (m, 20H), 0.90 (t, *J* = 7.2 Hz, 3H). <sup>13</sup>C NMR (200 MHz, MeOD) δ 174.50, 136.96, 128.41, 105.20, 105.10, 104.39, 103.84, 97.90, 83.54, 80.91, 80.16, 80.10, 76.86, 76.83, 76.78, 76.66, 76.45, 74.63, 74.03, 72.41, 71.69, 71.50, 71.27, 71.20, 70.99, 70.30, 70.06, 67.17, 66.81, 62.88, 62.64, 61.86, 61.74, 56.99, 56.77, 33.54, 33.24, 30.97, 30.93, 30.92, 30.81, 30.65, 30.57, 30.33, 23.91, 23.18, 14.61. ESI HRMS (m/z) calculated for C<sub>50</sub>H<sub>91</sub>N<sub>2</sub>O<sub>27</sub> (M + H) 1151.5804, found: 1151.5882.

*Synthesis of Galα3nLc4βCer (1): O-(α-D-galactopyranosyl)-(1→3)-(β-D-galactopyranosyl)-(1→4)-(2-acetamido-2-deoxy-β-D-glucopyranosyl)-(1→3)-(β-D-galactopyranosyl)-(1→4)-(β-D-glucopyranosyl)-(1→1)-(2S, 3R, 4E)-2-(hexadecaneacetamido)-octadec-4-ene-1, 3-diol (1)*

To a solution of sphingolipid **2** (8 mg, 0.007 mmol) in dry DMF (1 mL), HOBt (1.5 mg, 0.009 mmol), EDC·HCl (1.6 mg, 0.009 mmol), palmitic acid (2.2 mg, 0.009 mmol), and Et<sub>3</sub>N (105 mL, 0.01 mmol) were added to the solution. The reaction mixture was stirred under N<sub>2</sub> atmosphere at room temperature for 24 h. The reaction progress was monitored using mass spectrometry. After completion, the solution was concentrated under reduced pressure and passed through Sephadex<sup>™</sup> LH 20 using CH<sub>3</sub>OH as eluant to produce pure compound **1** (8 mg, 85%). <sup>1</sup>H NMR (800 MHz, MeOD) δ 5.70–5.66 (m, 1H), 5.45 (dd, *J* = 15.2, 7.2 Hz, 1H), 5.03 (d, *J* = 2.4 Hz, 1H), 4.66 (d, *J* = 8.8 Hz, 1H), 4.44 (d, *J* = 8.0 Hz, 1H), 4.36 (d, *J* = 7.2 Hz, 1H), 4.30 (d, *J* = 8.0 Hz, 1H), 4.22 (t, *J* = 6.4 Hz, 1H), 4.19 (dd, *J* = 9.6, 4.0 Hz, 1H), 4.07 (t, *J* = 8.0 Hz, 1H), 4.05–4.02 (m, 2H), 3.98–3.96 (m, 1H), 3.92–3.86 (m, 5H), 3.84–3.82 (m, 3H), 3.80–3.74 (m, 3H), 3.74–3.66 (m, 6H), 3.66–3.60 (m, 10H), 3.53 (t, *J* = 8.8 Hz, 1H), 3.43–3.40 (m, 3H), 3.30–3.27 (m, 1H), 2.17 (t, *J* = 7.2 Hz, 2H), 2.05–2.00 (m, 2H), 1.99 (s, 3H), 1.62–1.53 (m, 2H), 1.42–1.36 (m, 2H), 1.29 (s, 42H), 0.90 (t, *J* = 7.2 Hz, 6H). <sup>13</sup>C NMR (201 MHz, MeOD) δ 176.13, 174.55, 135.32, 131.57, 105.27, 105.22, 104.68, 104.44, 97.97, 83.56, 81.01, 80.51, 80.19, 76.91, 76.86, 76.72, 76.70, 76.46, 75.02, 74.15, 73.18, 72.47, 71.84, 71.58, 71.35, 71.26, 70.38, 70.15, 70.09, 66.89, 62.95, 62.69, 62.64, 61.96, 57.05, 54.88, 37.58, 33.67, 33.31, 33.30, 31.09, 31.06, 31.04, 31.03, 31.01, 31.00, 30.98, 30.92, 30.84, 30.72, 30.71, 30.68, 30.66, 30.63, 27.38, 23.96, 23.23, 14.66. ESI HRMS (m/z) calculated for C<sub>66</sub>H<sub>120</sub>N<sub>2</sub>O<sub>28</sub> (M + H) 1389.8100, found 1389.8165.

## References

1. M. Chen, L. L. Chen, Y. Zou, M. Xue, M. Liang, L. Jin, W. Y. Guan, J. Shen, W. Wang, L. Wang, J. Liu and P. G. Wang, *Carbohydr. Res.*, 2011, **346**, 2421–2425.
2. Y. Chen, V. Thon, Y. Li, H. Yu, L. Ding, K. Lau, J. Qu, L. Hie and X. Chen, *Chem. Commun.*, 2011, **47**, 10815–10817.
3. Y. Li, H. Yu, Y. Chen, K. Lau, L. Cai, H. Cao, V. K. Tiwari, J. Qu, V. Thon, P. G. Wang and X. Chen, *Molecules*, 2011, **16**, 6396–6407.
4. K. Lau, V. Thon, H. Yu, L. Ding, Y. Chen, M. M. Muthana, D. Wong, R. Huang and X. Chen, *Chem. Commun.*, 2010, **46**, 6066–6068.
5. W. Guan, L. Ban, L. Cai, L. Li, W. Chen, X. Liu, M. Mrksich and P. G. Wang, *Bioorg. Med. Chem. Lett.*, 2011, **21**, 5025–5028.
6. X. Chen, J. Fang, J. Zhang, Z. Liu, J. Shao, P. Kowal, P. Andreana and P. G. Wang, *J. Am. Chem. Soc.*, 2001, **123**, 2081–2082.
7. J. Fang, J. Li, X. Chen, Y. Zhang, J. Wang, Z. Guo, W. Zhang, L. Yu, K. Brew and P. G. Wang, *J. Am. Chem. Soc.*, 1998, **120**, 6635–6638.
8. Y. Liu and R. Bittman, *Chem. Phys. Lipids*, 2006, **142**, 58–69.
9. S. Kim, S. Lee, T. Lee, H. Ko and D. Kim, *J. Org. Chem.*, 2006, **71**, 8661–8664.
10. Y. Liu, N. Ding, H. Xiao and Y. Li, *J. Carbohydr. Chem.*, 2006, **25**, 471–489.
11. P. Zimmermann, R. Sommer, T. Bär and R. R. Schmidt, *J. Carbohydr. Chem.*, 1988, **7**, 435–452.
12. H. Bayley, D. N. Standring and J. R. Knowles, *Tetrahedron Lett.*, 1978, **19**, 3633–3634.
13. J. J. Gaudino and J. C. Paulson, *J. Am. Chem. Soc.*, 1994, **116**, 1149–1150.
14. J. R. Rich, A. M. Cunningham, M. Gilbert and S. G. Withers, *Chem. Commun.*, 2011, **47**, 10806–10808.







$^1\text{H}$  NMR (800 MHz,  $\text{CDCl}_3$ ) and  $^{13}\text{C}$  NMR spectra of *O*-(2,3,4,6-tetra-*O*-benzoyl- $\beta$ -D-galactopyranosyl)-(1 $\rightarrow$ 4)-(2,3,6-tri-*O*-benzoyl- $\beta$ -D-glucopyranosyl)-(1 $\rightarrow$ 1)-(2*S*, 3*R*, 4*E*)-2-azido-3-*O*-benzoyloxy-octadec-4-ene (**14**)

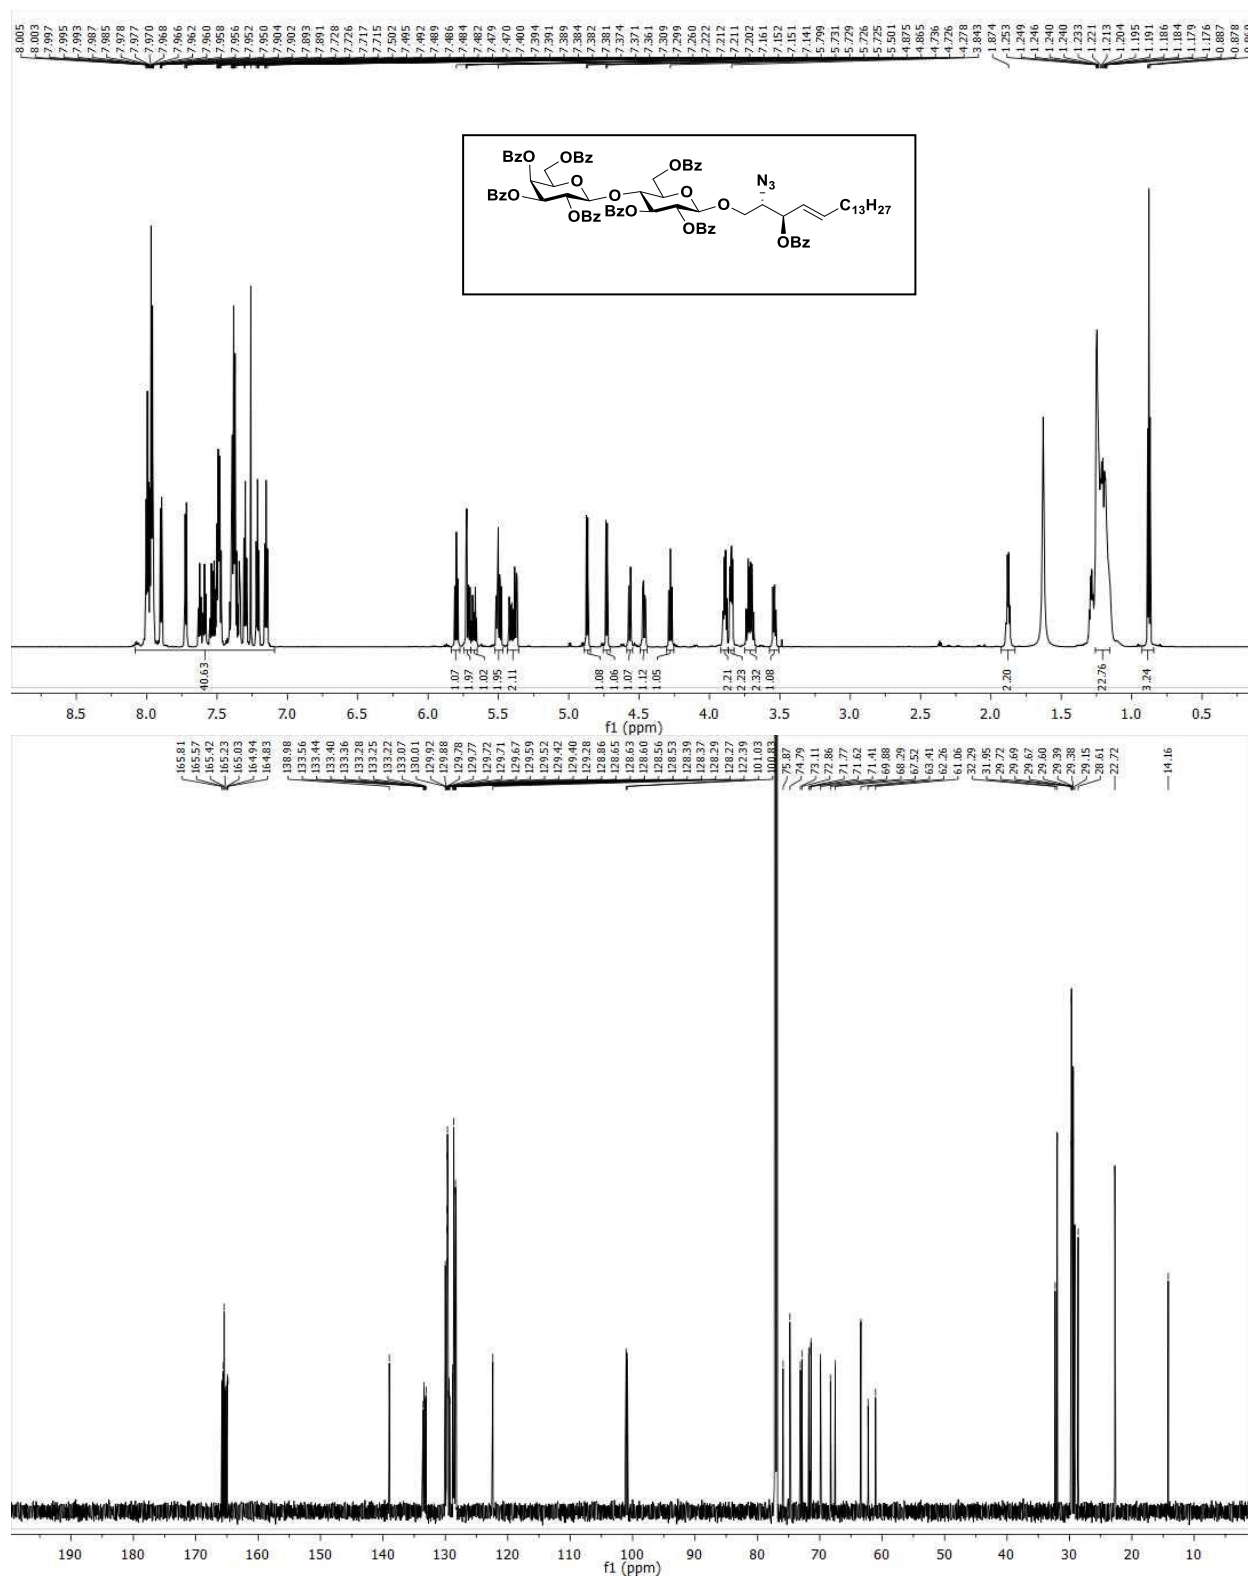

$^1\text{H}$  NMR (800 MHz,  $\text{CD}_3\text{OD}$ ) and  $^{13}\text{C}$  NMR spectra of Lac $\beta$ Sph (**5**)

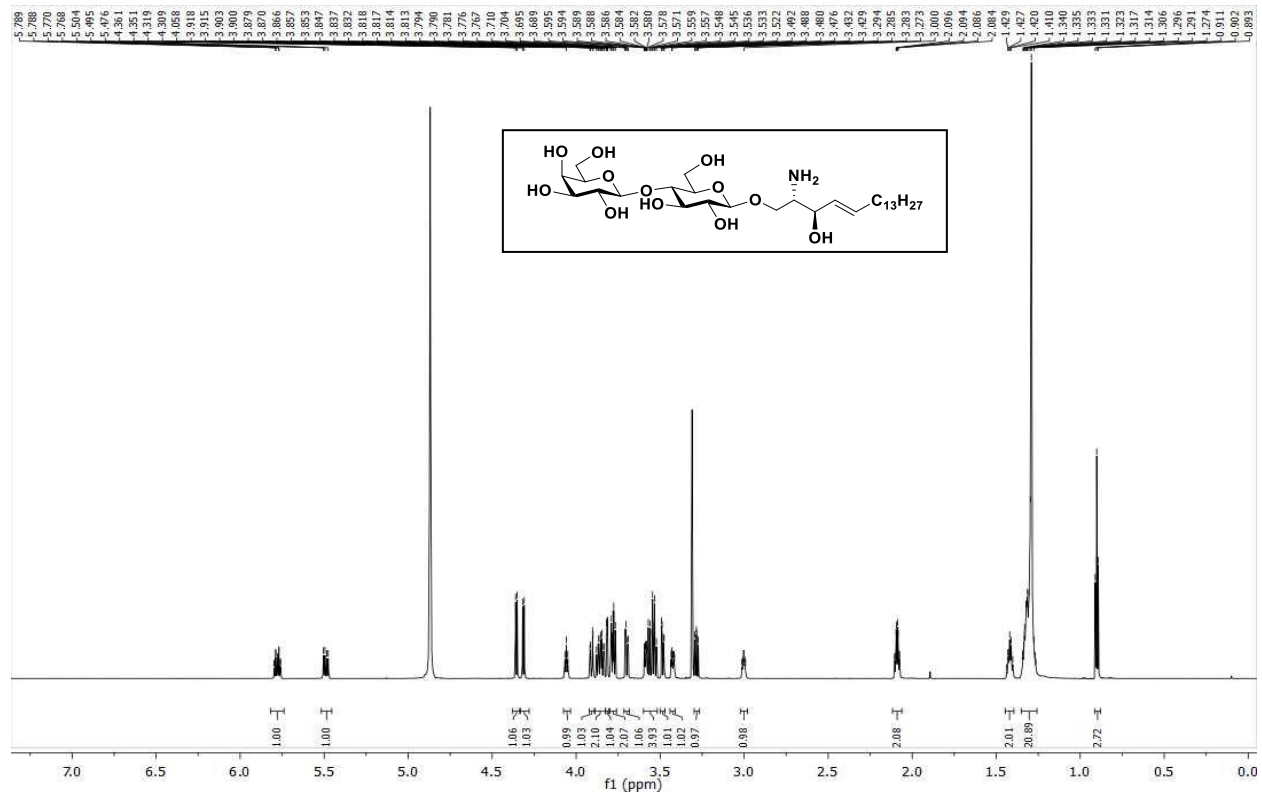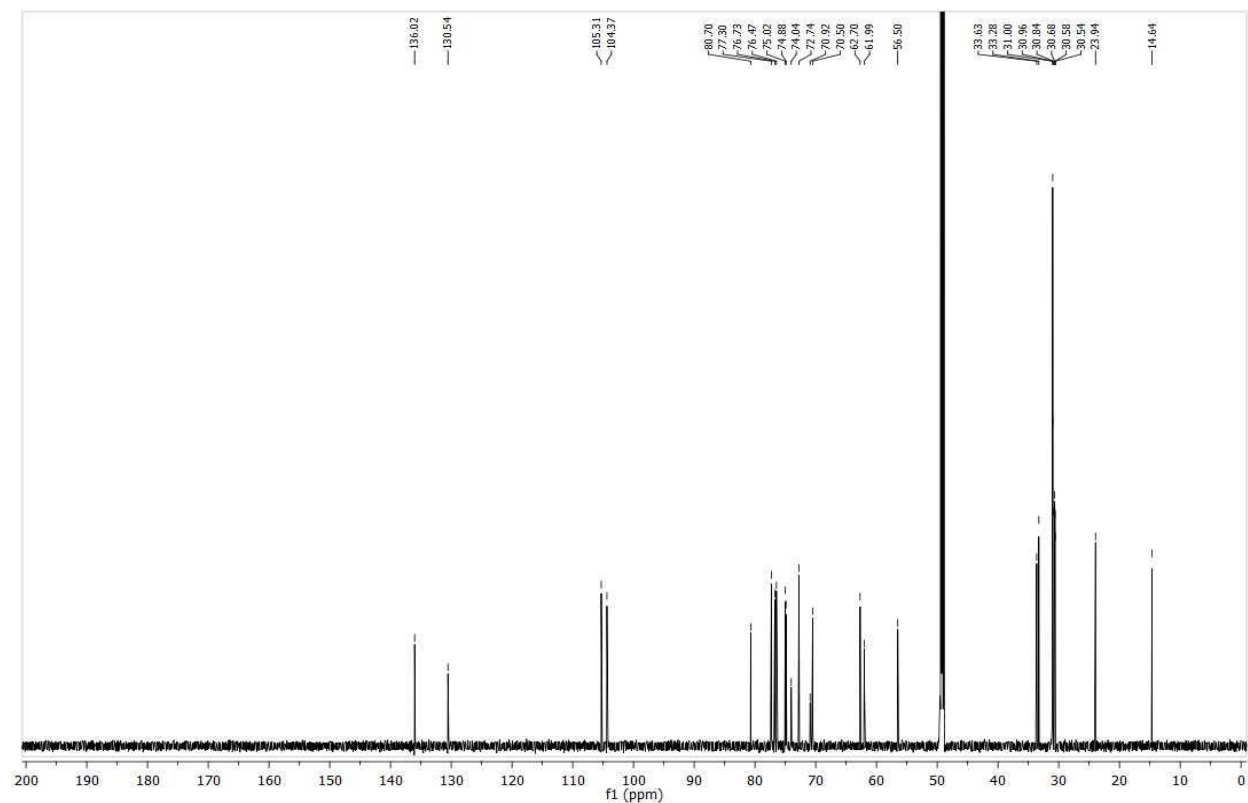

$^1\text{H}$  NMR (800 MHz,  $\text{CD}_3\text{OD}$ ) and  $^{13}\text{C}$  NMR spectra of  $\text{Lc}_3\beta\text{Sph}$  (4)

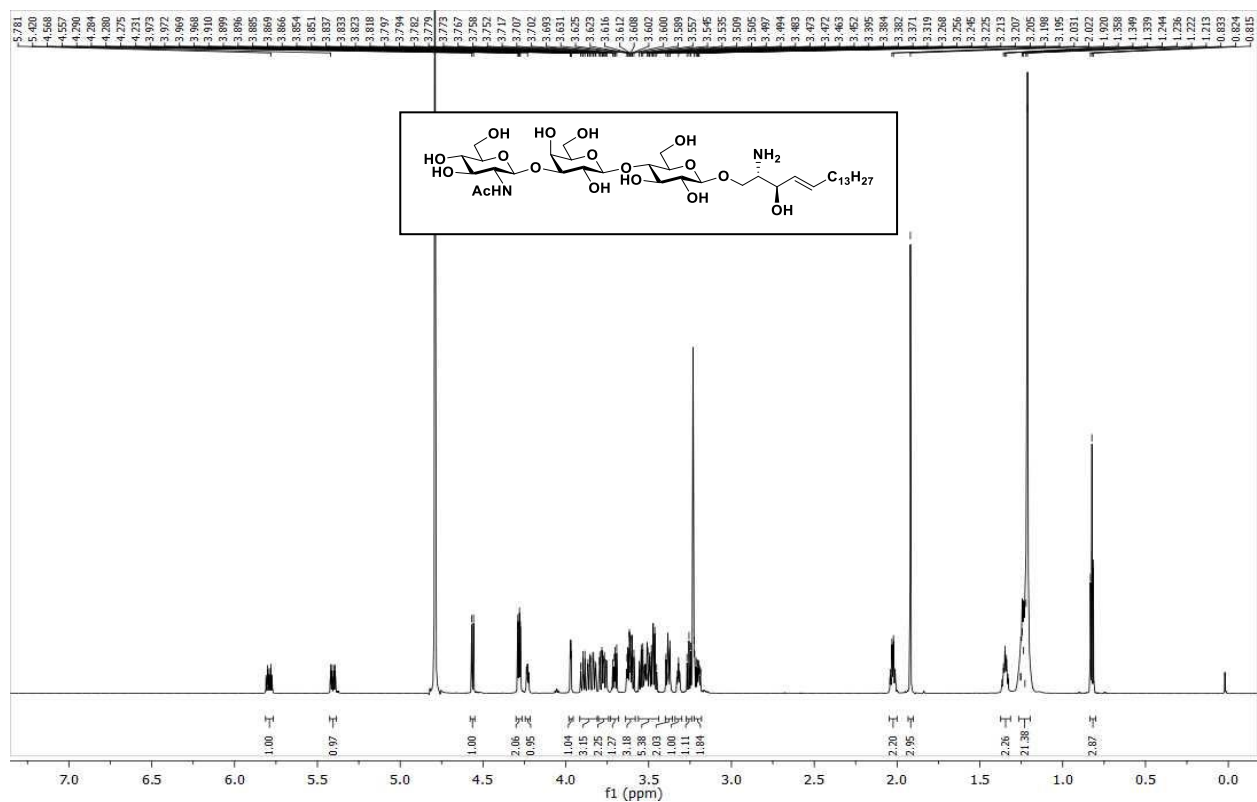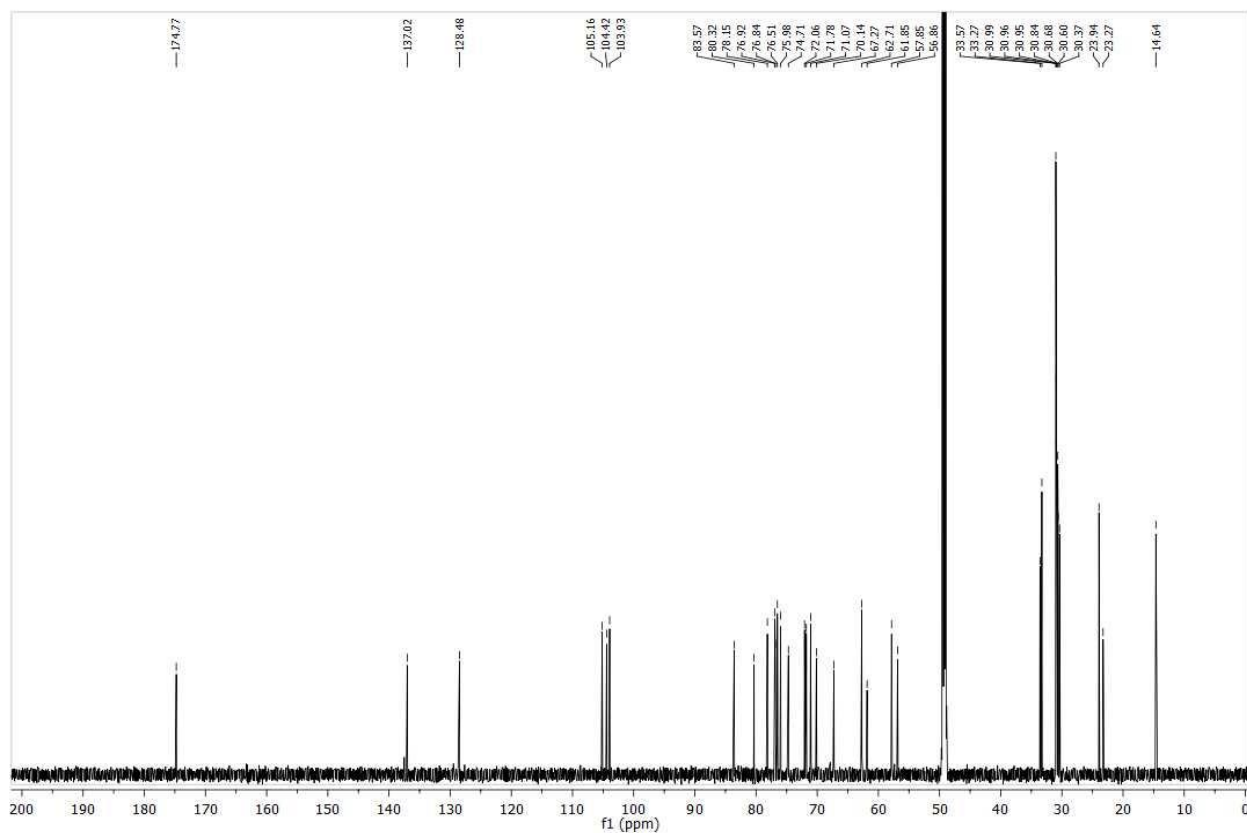

$^1\text{H}$  NMR (800 MHz,  $\text{CD}_3\text{OD}$ ) and  $^{13}\text{C}$  NMR spectra of nLc4 $\beta$ Sph (**3**)

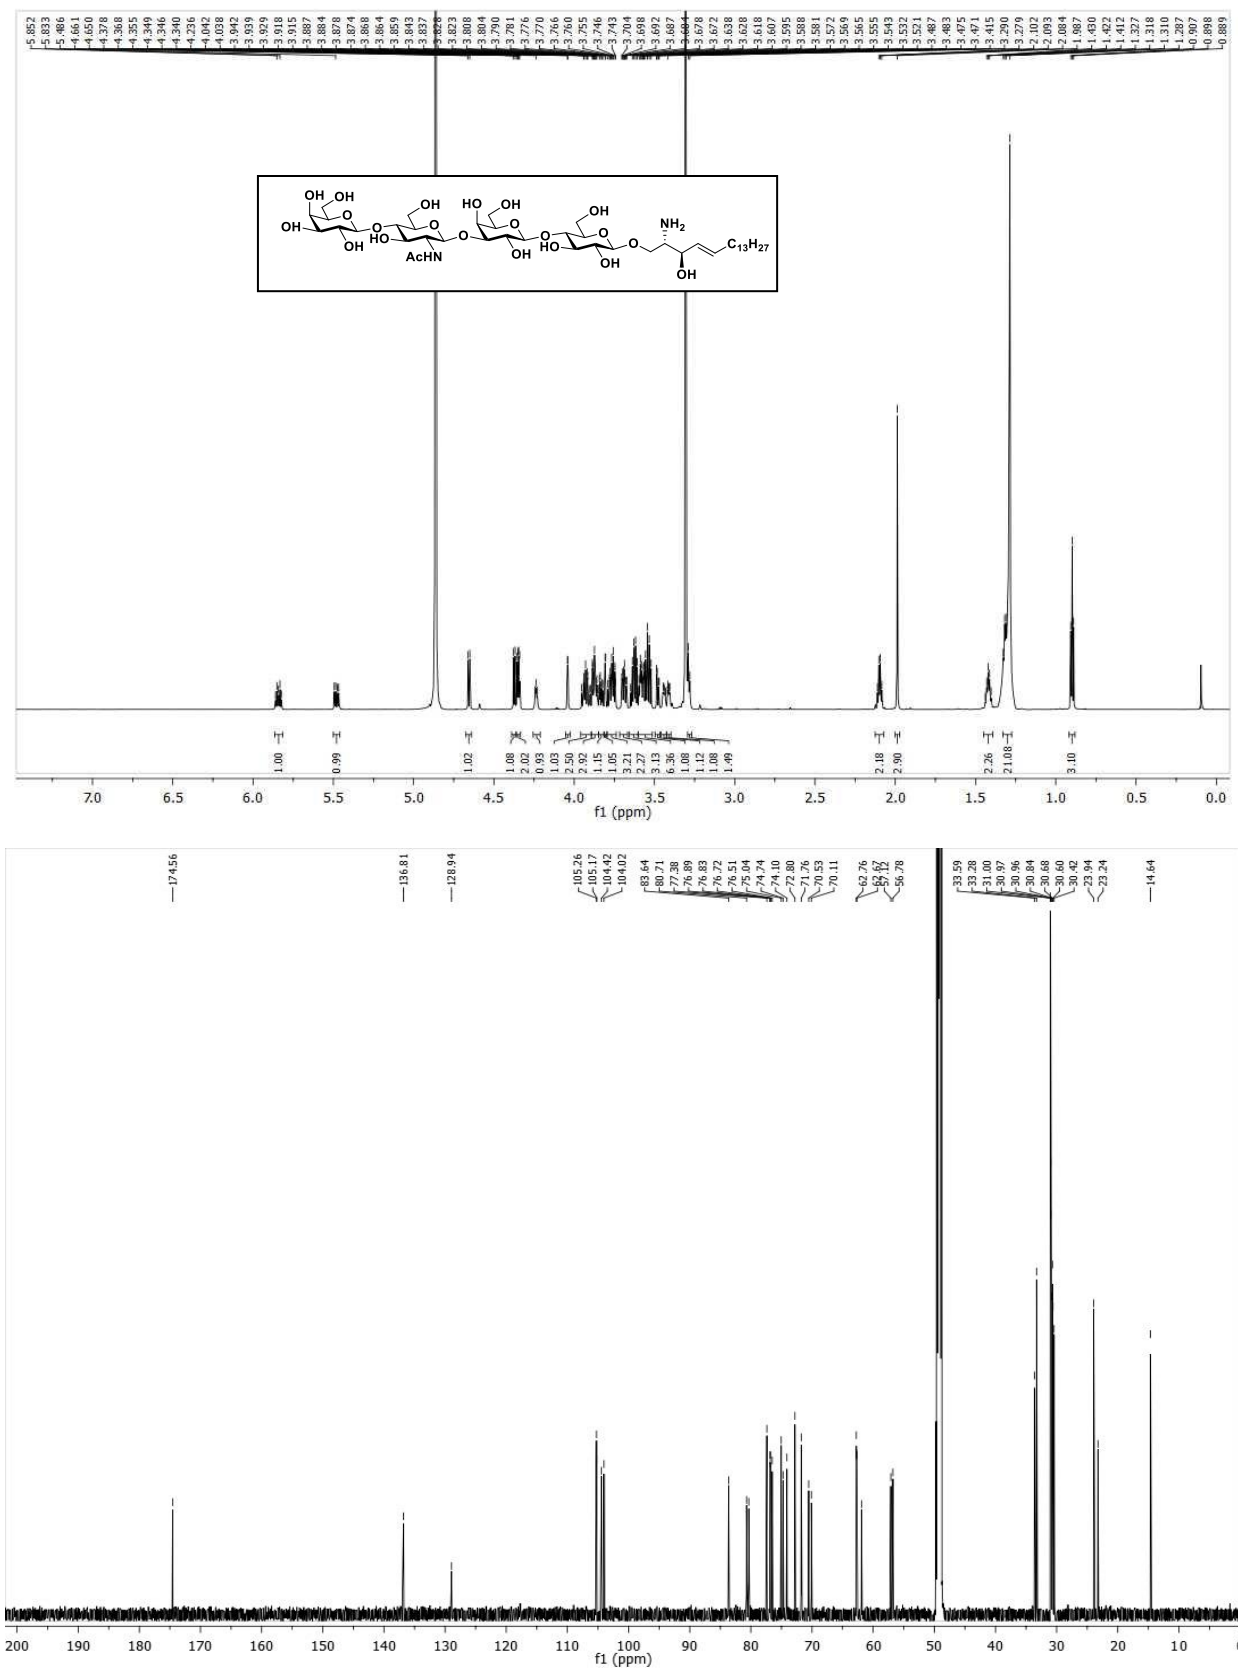

$^1\text{H}$  NMR (800 MHz,  $\text{CD}_3\text{OD}$ ) and  $^{13}\text{C}$  NMR spectra of Gal $\alpha$ 3nLc4 $\beta$ Sph (2)

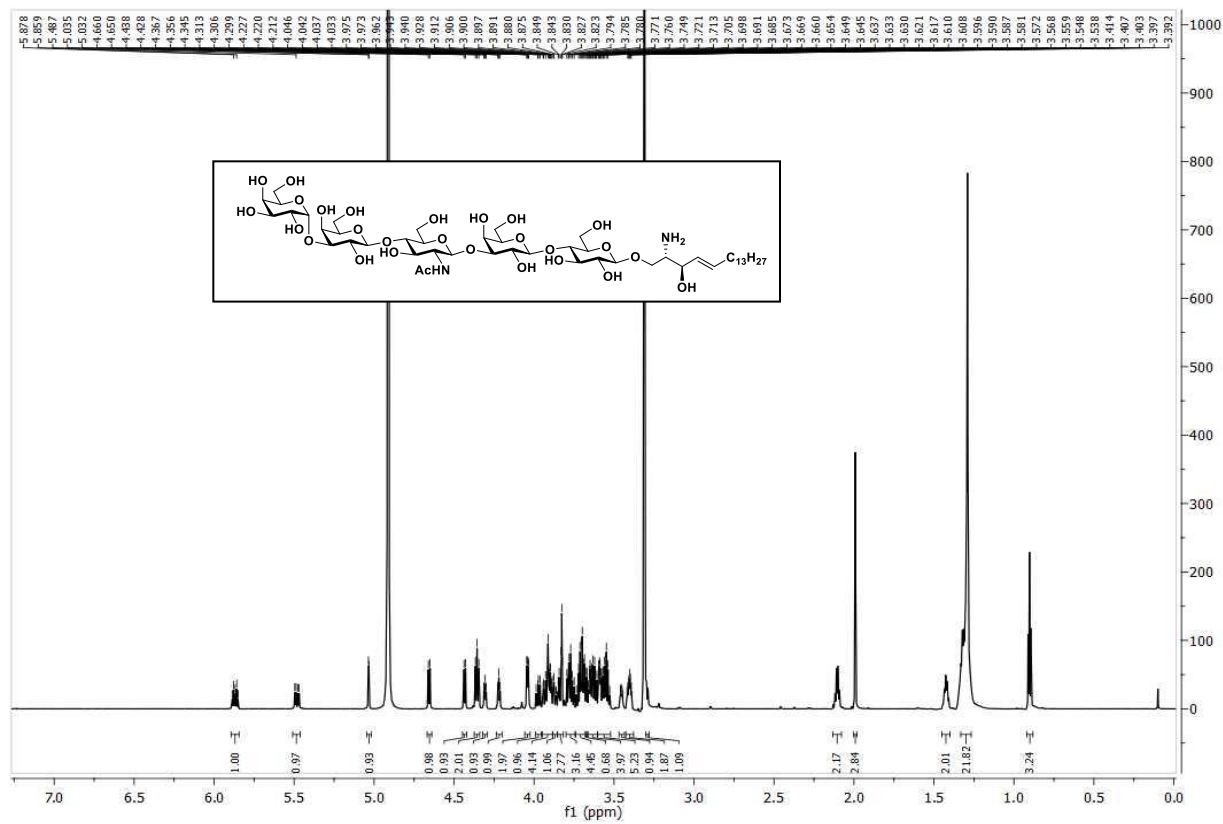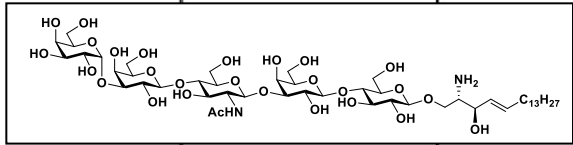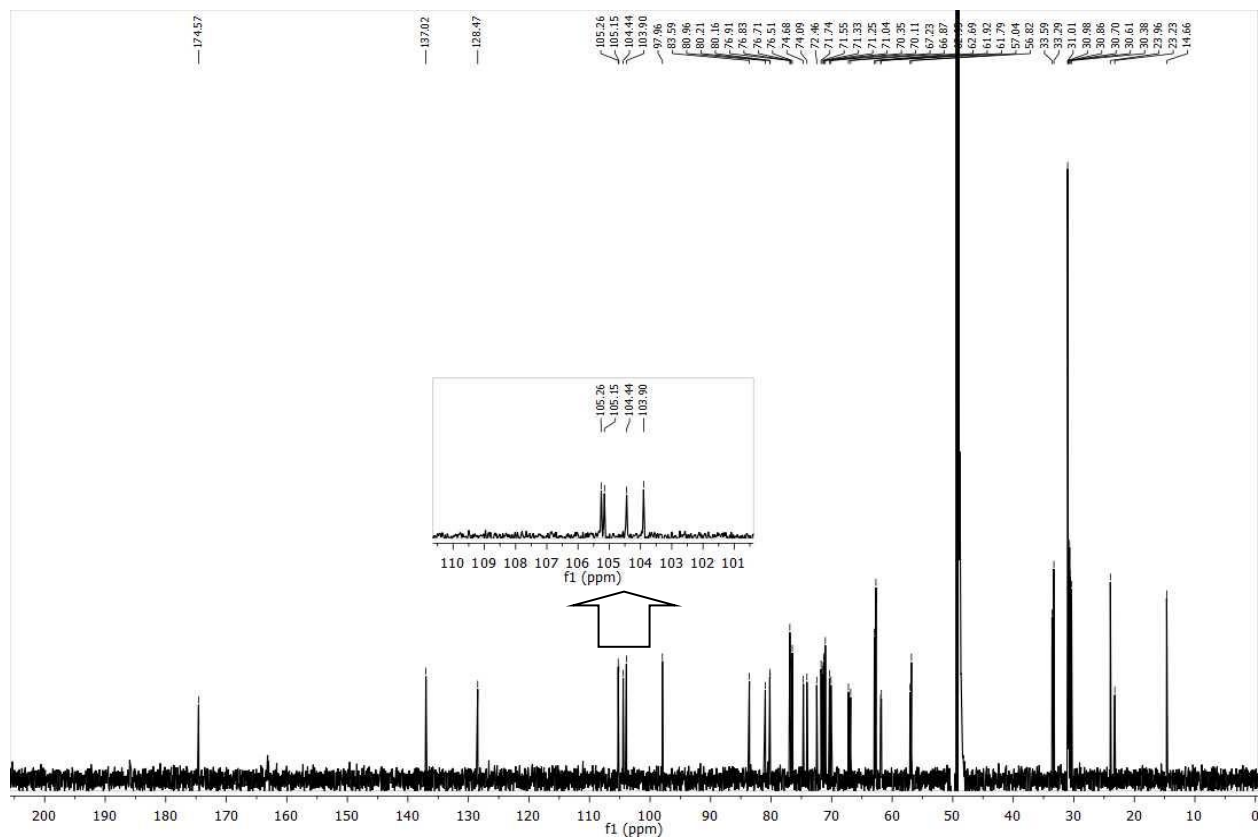

$^1\text{H}$  NMR (800 MHz,  $\text{CD}_3\text{OD}$ ) and  $^{13}\text{C}$  NMR spectra of Gal $\alpha$ 3nLc $\beta$ Cer (1)

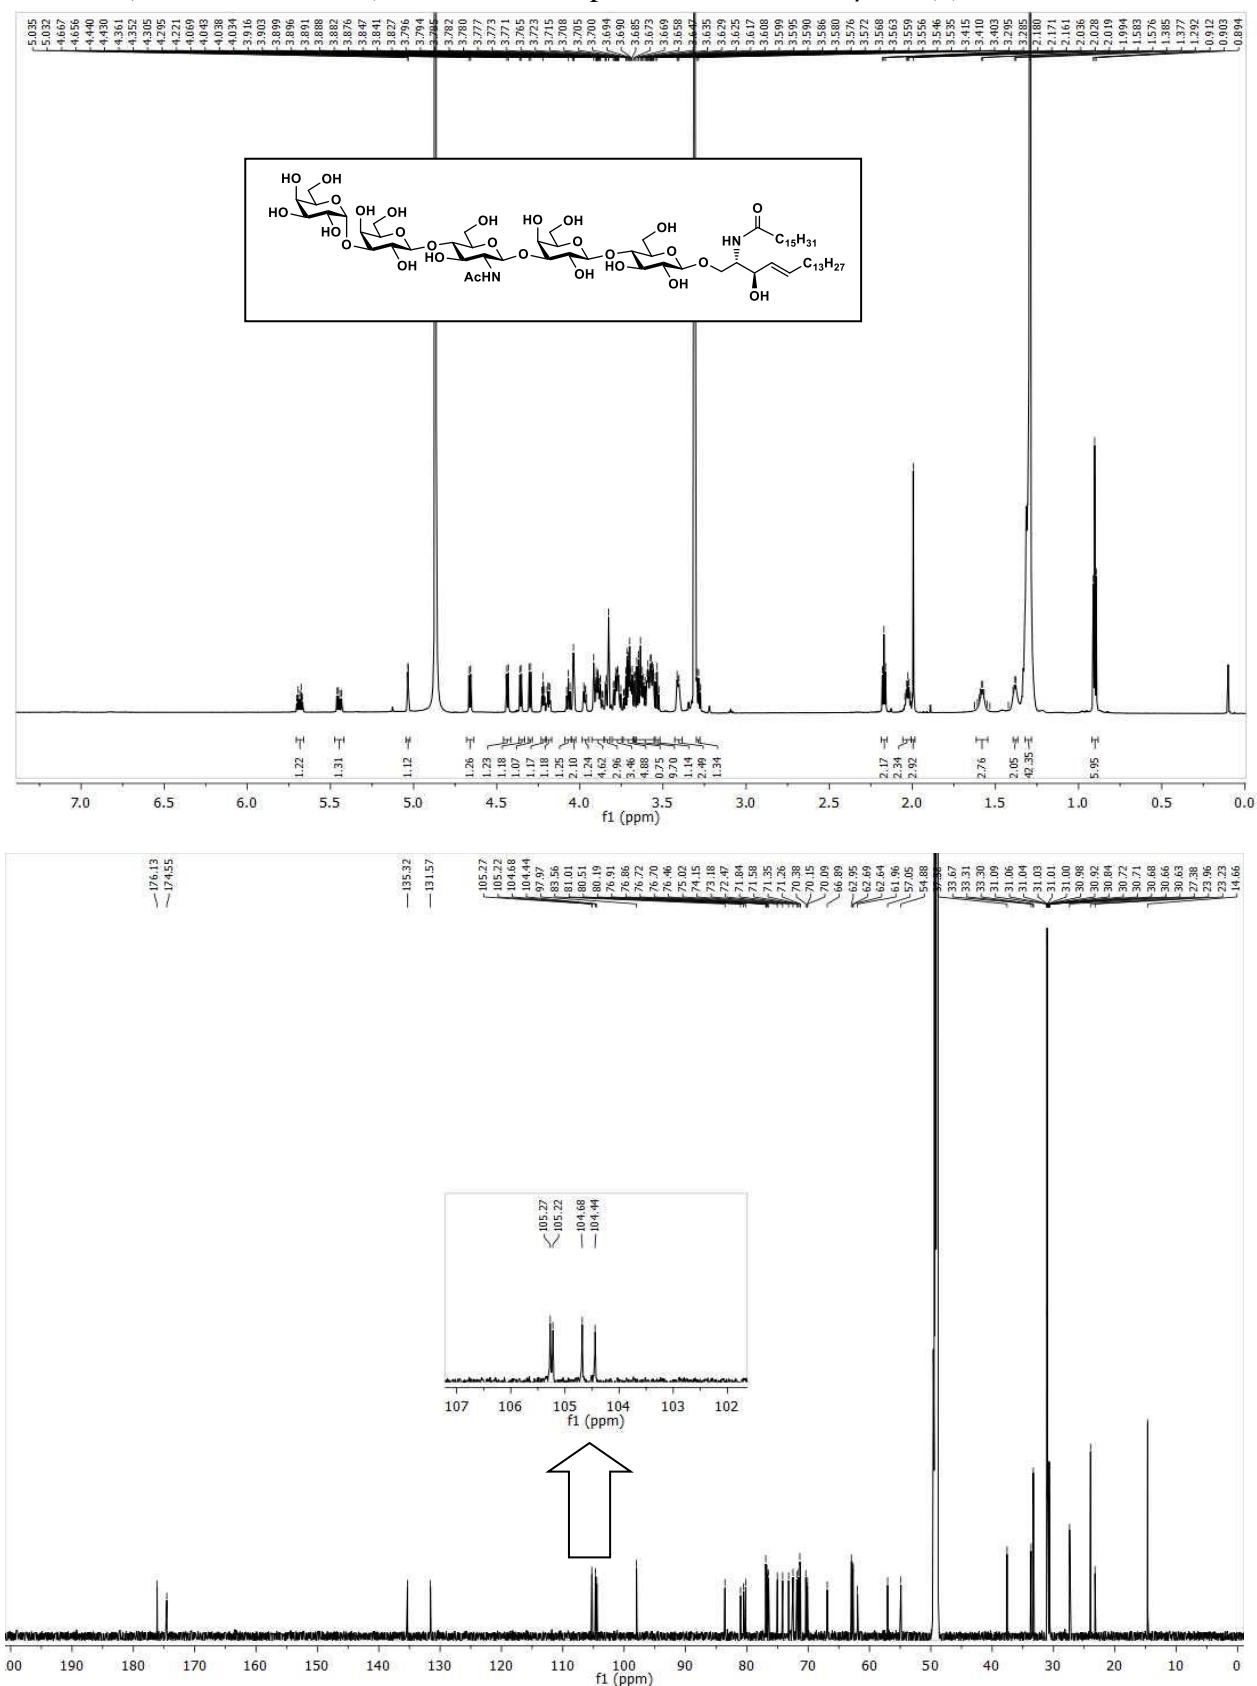

Supplement: NIHMS892658-supplement-SI.pdf [file NIHMS892658-supplement-SI.pdf]
